# Supplementary material for: Structural investigation of Keap1–Nrf2 protein–protein interaction (PPI) inhibitors for treating myocarditis through molecular simulations
Source: Royal Society of Chemistry journal article supplement (doi:10.1039/d2nj03078k), 2023-01-01
Supplement: d2nj03078k1.pdf [file d2nj03078k1.pdf]

## Supplementary Materials

**Table S1** Experimental and predicted activity values of compounds.

| No. | R <sub>1</sub>     | Obs.  | CoMFA | Err(%) | CoMSIA | Err%  |
|-----|--------------------|-------|-------|--------|--------|-------|
|     |                    |       |       |        |        |       |
| 1*  | 5-CH <sub>3</sub>  | 4.03  | 4.106 | 1.883  | 4.007  | 0.568 |
| 2   | 4-CH <sub>3</sub>  | 4.019 | 4.042 | 0.580  | 3.979  | 1.000 |
| 3   | 2-CH <sub>3</sub>  | 4.522 | 4.503 | 0.425  | 4.511  | 0.245 |
| 4   | H                  | 3.993 | 4.017 | 0.596  | 3.96   | 0.816 |
| 5   | 2-F                | 4.097 | 4.102 | 0.117  | 4.066  | 0.759 |
| 6   | 2-OCH <sub>3</sub> | 4.257 | 4.248 | 0.207  | 4.268  | 0.249 |
| No. | Structure          | Obs.  | CoMFA | Err(%) | CoMSIA | Err%  |
| 7   |                    | 4.84  | 4.88  | 0.816  | 4.774  | 1.372 |
| 8   |                    | 4.812 | 4.883 | 1.467  | 4.856  | 0.906 |
| No. | R <sub>2</sub>     | Obs.  | CoMFA | Err(%) | CoMSIA | Err%  |
|     |                    |       |       |        |        |       |
| 9   | 4-OCH <sub>3</sub> | 4.009 | 4.029 | 0.499  | 4.072  | 1.584 |

|    |                     |       |       |       |       |       |
|----|---------------------|-------|-------|-------|-------|-------|
| 10 | H                   | 4.376 | 4.163 | 4.872 | 4.226 | 3.430 |
| 11 | 3-CN                | 4.605 | 4.632 | 0.582 | 4.629 | 0.515 |
| 12 | 3-NO <sub>2</sub>   | 4.564 | 4.572 | 0.164 | 4.577 | 0.289 |
| 13 | 2,3-CH <sub>3</sub> | 4.008 | 4.074 | 1.657 | 4.094 | 2.158 |

| No. | R <sub>3</sub> | Obs. | CoMFA | Err(%) | CoMSIA | Err% |
|-----|----------------|------|-------|--------|--------|------|
|-----|----------------|------|-------|--------|--------|------|

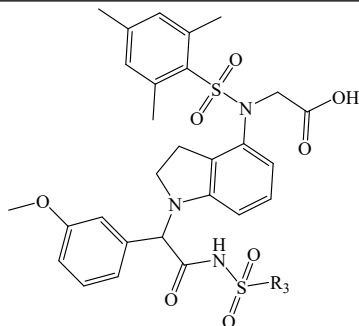

|     |  |       |       |       |       |       |
|-----|--|-------|-------|-------|-------|-------|
| 14* |  | 5.74  | 5.604 | 2.362 | 5.59  | 2.620 |
| 15  |  | 5.243 | 5.255 | 0.231 | 5.436 | 3.685 |
| 16  |  | 5.311 | 5.383 | 1.359 | 5.278 | 0.619 |
| 17* |  | 5.287 | 5.518 | 4.377 | 5.503 | 4.078 |

| No. | R <sub>4</sub> | Obs. | CoMFA | Err(%) | CoMSIA | Err% |
|-----|----------------|------|-------|--------|--------|------|
|-----|----------------|------|-------|--------|--------|------|

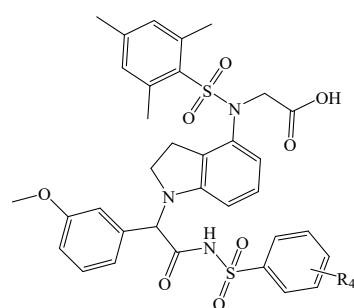

|     |                    |       |       |       |       |       |
|-----|--------------------|-------|-------|-------|-------|-------|
| 18* | 4-OCH <sub>3</sub> | 5.47  | 5.677 | 3.790 | 5.71  | 4.382 |
| 19  | 4-CH <sub>3</sub>  | 5.857 | 5.725 | 2.257 | 5.682 | 2.991 |
| 20* | 4-F                | 5.544 | 5.558 | 0.258 | 5.579 | 0.637 |
| 21  | 4-Cl               | 5.535 | 5.581 | 0.840 | 5.62  | 1.543 |
| 22* | 4-Br               | 5.53  | 5.608 | 1.405 | 5.633 | 1.855 |
| 23* | 2-OCH <sub>3</sub> | 5.879 | 5.711 | 2.849 | 5.641 | 4.045 |
| 24  | 2-CH <sub>3</sub>  | 5.747 | 5.772 | 0.433 | 5.829 | 1.425 |

|     |                                    |       |       |       |       |       |
|-----|------------------------------------|-------|-------|-------|-------|-------|
| 25  | 2-OCH <sub>2</sub> CH <sub>3</sub> | 5.592 | 5.574 | 0.315 | 5.646 | 0.964 |
| 26  | 2-CH <sub>2</sub> CH <sub>3</sub>  | 5.446 | 5.498 | 0.946 | 5.513 | 1.239 |
| 27  | 2-Cl                               | 5.559 | 5.535 | 0.425 | 5.592 | 0.594 |
| 28  | 2-Br                               | 5.631 | 5.586 | 0.794 | 5.586 | 0.803 |
| 29* | 2-OCF <sub>3</sub>                 | 5.014 | 5.31  | 5.903 | 5.448 | 8.650 |
| 30* | 2,4-CH <sub>3</sub>                | 5.577 | 5.905 | 5.883 | 5.921 | 6.175 |
| 31* | 2,4-OCH <sub>3</sub>               | 6.194 | 5.83  | 5.872 | 6.058 | 2.199 |

| No. | Structure                                                                         | Obs.  | CoMFA | Err(%) | CoMSIA | Err%  |
|-----|-----------------------------------------------------------------------------------|-------|-------|--------|--------|-------|
| 32  | 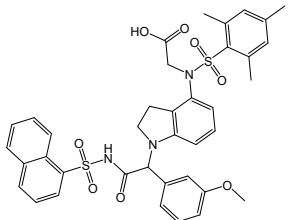 | 5.742 | 5.698 | 0.759  | 5.714  | 0.484 |

| No. | R <sub>5</sub>                                                                      | Obs.  | CoMFA | Err(%) | CoMSIA | Err%  |
|-----|-------------------------------------------------------------------------------------|-------|-------|--------|--------|-------|
|     | 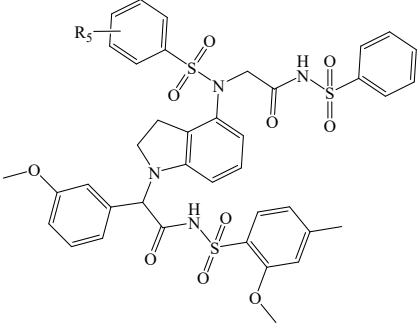 |       |       |        |        |       |
| 33  | 2,4,6-CH <sub>3</sub>                                                               | 7.237 | 7.258 | 0.283  | 7.046  | 2.643 |
| 34  | 4-OCH <sub>3</sub>                                                                  | 7.194 | 7.1   | 1.312  | 7.106  | 1.223 |
| 35  | 4-CH <sub>3</sub>                                                                   | 6.959 | 6.946 | 0.187  | 6.974  | 0.210 |
| 36  | 3-OCH <sub>3</sub>                                                                  | 6.824 | 6.826 | 0.035  | 6.853  | 0.426 |
| 37  | H                                                                                   | 6.62  | 6.619 | 0.018  | 6.703  | 1.252 |
| No. | R <sub>6</sub>                                                                      | Obs.  | CoMFA | Err(%) | CoMSIA | Err%  |

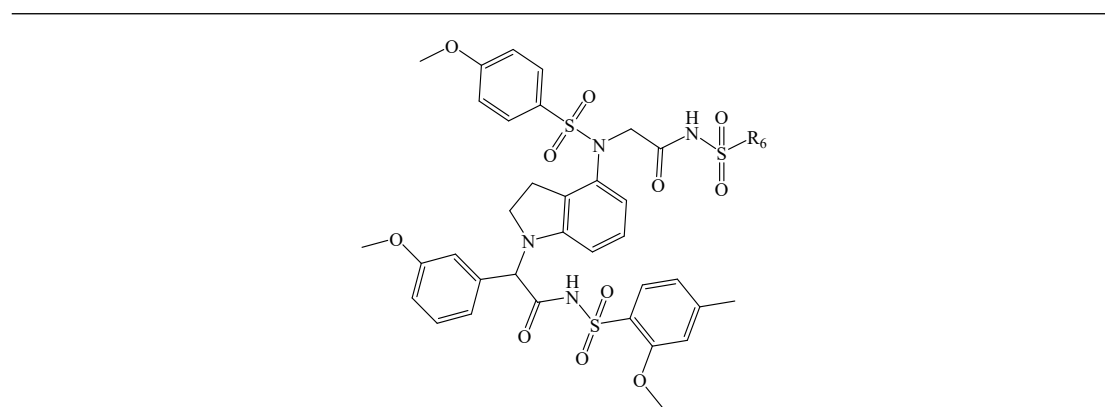

|    |  |       |       |       |       |       |
|----|--|-------|-------|-------|-------|-------|
| 38 |  | 5.759 | 5.762 | 0.059 | 5.614 | 2.513 |
| 39 |  | 5.287 | 5.272 | 0.291 | 5.337 | 0.951 |

| No. | R <sub>7</sub> | Obs. | CoMFA | Err(%) | CoMSIA | Err% |
|-----|----------------|------|-------|--------|--------|------|
|-----|----------------|------|-------|--------|--------|------|

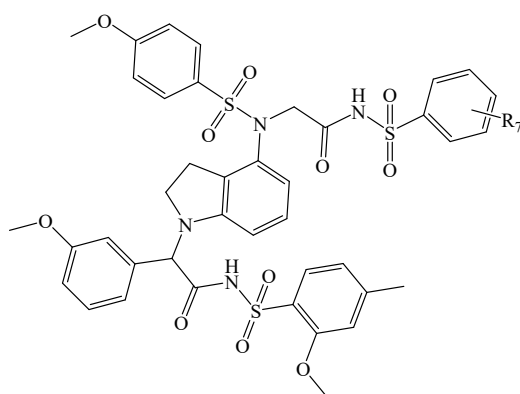

|    |                                    |       |       |       |       |       |
|----|------------------------------------|-------|-------|-------|-------|-------|
| 40 | 4-CH <sub>3</sub>                  | 6.921 | 6.905 | 0.231 | 6.917 | 0.052 |
| 41 | 4-F                                | 6.886 | 7.024 | 2.011 | 7.074 | 2.723 |
| 42 | 4-CF <sub>3</sub>                  | 6.398 | 6.411 | 0.209 | 6.364 | 0.533 |
| 43 | 4-OCH <sub>2</sub> CH <sub>3</sub> | 7.319 | 7.294 | 0.342 | 7.273 | 0.633 |

**Table S2** SMILES format for the designed molecules.

| No. | SMILES format                                                                                                                                                                                                                                                                                                                                                            |
|-----|--------------------------------------------------------------------------------------------------------------------------------------------------------------------------------------------------------------------------------------------------------------------------------------------------------------------------------------------------------------------------|
| N1  | <chem>O=[S](=O)(N(C=1C2=C(C([H])=C([H])C=1[H])N(C([H])([H])C2([H])[H])[C@@]([H])(C(=O)N([H])[S](=O)(=O)C=3C([H])=C([H])C=C([H])C=3OC([H])([H])[H]C([H])([H])[H])C=4C([H])=C([H])C([H])=C(OC([H])([H])[H])C=4[H])C([H])([H])C(=O)N([H])[S](=O)(=O)c6c(c5C([H])=C(N([H])c5c([H])c6[H])C([H])([H])[H])C([H])([H])[H])C=7C([H])=C([H])C(OC([H])([H])[H])=C([H])C=7[H]</chem> |

- N2 O=[S](=O)(N(c1c2c(c([H])c([H])c1[H])N(C([H])([H])C2([H])[H])[C@@]([H])(C(=O)N([H])[S](=O)(=O)c3c([H])c([H])c(c([H])c3OC([H])([H])[H])C([H])([H])[H])c4c([H])c([H])c([H])c(OC([H])([H])[H])c4[H])C([H])([H])C(=O)N([H])[S](=O)(=O)c6c(c5c([H])c(n([H])c5c([H])c6[H])C([H])([H])[H])C([H])([H])C([H])([H])[H])c7c([H])c([H])c(OC([H])([H])[H])c([H])c7[H])
- N3 O=[S](=O)(N(C=1C2=C(C([H])=C([H])C=1[H])N(C([H])([H])C2([H])[H])[C@@]([H])(C(=O)N([H])[S](=O)(=O)C=3C([H])=C([H])C(=C([H])C=3OC([H])([H])[H])C([H])([H])[H])C=4C([H])=C([H])C([H])=C(OC([H])([H])[H])C=4[H])C([H])([H])C(=O)N([H])[S](=O)(=O)c6c(c5C([H])=C(N([H])c5c([H])c6[H])C([H])([H])[H])C([H])([H])C([H])([H])C([H])([H])C([H])([H])[H])C=7C([H])=C([H])C(OC([H])([H])[H])=C([H])C=7[H])
- N4 O=[S](=O)(N(C=1C2=C(C([H])=C([H])C=1[H])N(C([H])([H])C2([H])[H])[C@@]([H])(C(=O)N([H])[S](=O)(=O)C=3C([H])=C([H])C(=C([H])C=3OC([H])([H])[H])C([H])([H])[H])C=4C([H])=C([H])C([H])=C(OC([H])([H])[H])C=4[H])C([H])([H])C(=O)N([H])[S](=O)(=O)c6c(c5C([H])=C(N([H])c5c([H])c6[H])C([H])([H])[H])[C@]([H])(C([H])([H])C([H])([H])[H])C([H])([H])[H])C=7C([H])=C([H])C(OC([H])([H])[H])=C([H])C=7[H])
- N5 O=[S](=O)(N(c1c2c(c([H])c([H])c1[H])N(C([H])([H])C2([H])[H])[C@@]([H])(C(=O)N([H])[S](=O)(=O)c3c([H])c([H])c(c([H])c3OC([H])([H])[H])C([H])([H])[H])c4c([H])c([H])c([H])c(OC([H])([H])[H])c4[H])C([H])([H])C(=O)N([H])[S](=O)(=O)c6c(c5c([H])c(n([H])c5c([H])c6[H])C([H])([H])[H])C([H])([H])C([H])([H])C([H])([H])C([H])([H])C([H])([H])C([H])([H])[H])c7c([H])c([H])c(OC([H])([H])[H])c([H])c7[H])
- N6 O=[S](=O)(N(c1c2c(c([H])c([H])c1[H])N(C([H])([H])C2([H])[H])[C@@]([H])(C(=O)N([H])[S](=O)(=O)c3c([H])c([H])c(c([H])c3OC([H])([H])[H])C([H])([H])[H])c4c([H])c([H])c([H])c(OC([H])([H])[H])c4[H])C([H])([H])C(=O)N([H])[S](=O)(=O)c6c(c5c([H])c(n([H])c5c([H])c6[H])C([H])([H])[H])C([H])([H])C([H])([H])C([H])([H])C([H])([H])C([H])([H])C([H])([H])C([H])([H])[H])c7c([H])c([H])c(OC([H])([H])[H])c([H])c7[H])
- N7 O=[S](=O)(N(c1c2c(c([H])c([H])c1[H])N(C([H])([H])C2([H])[H])[C@@]([H])(C(=O)N([H])[S](=O)(=O)c3c([H])c([H])c(c([H])c3OC([H])([H])[H])C([H])([H])[H])c4c([H])c([H])c([H])c(OC([H])([H])[H])c4[H])C([H])([H])C(=O)N([H])[S](=O)(=O)c6c(c5c([H])c(n([H])c5c([H])c6[H])C([H])([H])[H])C([H])([H])C([H])([H])C([H])([H])C([H])([H])C([H])([H])C([H])([H])C([H])([H])[H])c7c([H])c([H])c(OC([H])([H])[H])c([H])c7[H])
- N8 O=[S](=O)(N(C=1C2=C(C([H])=C([H])C=1[H])N(C([H])([H])C2([H])[H])[C@@]([H])(C(=O)N([H])[S](=O)(=O)C=3C([H])=C([H])C(=C([H])C=3OC([H])([H])[H])C([H])([H])[H])C=4C([H])=C([H])C([H])=C(OC([H])([H])[H])C=4[H])C([H])([H])C(=O)N([H])[S](=O)(=O)c6c(c5C([H])=C(N([H])c5c([H])c6[H])C([H])([H])[H])C([H])([H])C([H])([H])C([H])([H])C([H])([H])C([H])([H])[H])C=7C([H])=C([H])C(OC([H])([H])[H])=C([H])C=7[H])



|        |        |        |        |        |         |
|--------|--------|--------|--------|--------|---------|
| Ser363 | -1.116 | -3.761 | -0.148 | -0.925 | -5.950  |
| Gly364 | -2.371 | -0.452 | -0.794 | -1.375 | -4.992  |
| Arg380 | -2.366 | -3.461 | 0.725  | -1.303 | -6.404  |
| Asn414 | -1.218 | -1.937 | -1.419 | -0.554 | -5.127  |
| Arg415 | -3.918 | -6.610 | -0.342 | -2.716 | -13.586 |
| Gln530 | -0.882 | -4.646 | -0.138 | -0.707 | -6.374  |
| Ser555 | -0.615 | -5.753 | 1.133  | -0.632 | -5.867  |
| Ala556 | -2.186 | -0.861 | 0.965  | -1.622 | -3.703  |
| Ser602 | -0.877 | -0.775 | 0.735  | -0.511 | -1.428  |

---

**Compound N3 / Keap1 system**

---

|        |        |        |        |        |        |
|--------|--------|--------|--------|--------|--------|
| Tyr334 | -4.647 | -0.718 | 0.862  | -2.863 | -7.366 |
| Ser363 | -1.838 | -0.972 | -0.096 | -1.158 | -4.065 |
| Gly364 | -1.944 | -0.627 | -0.405 | -1.132 | -4.108 |
| Arg380 | -1.303 | 0.875  | -1.853 | -1.082 | -3.362 |
| Asn414 | -0.677 | -0.097 | -0.893 | -0.301 | -1.968 |
| Arg415 | -3.220 | -4.856 | 1.355  | -2.035 | -8.757 |
| Gln530 | -0.113 | -0.258 | -0.230 | -0.026 | -0.627 |
| Ser555 | -0.416 | -0.504 | 0.117  | -0.090 | -0.893 |
| Ala556 | -2.164 | -1.207 | 0.015  | -1.577 | -4.933 |
| Ser602 | -0.867 | -4.560 | 0.041  | -0.709 | -6.094 |

---

**Compound N4 / Keap1 system**

---

|        |        |        |       |        |        |
|--------|--------|--------|-------|--------|--------|
| Tyr334 | -1.793 | -0.249 | 0.312 | -1.469 | -3.198 |
|--------|--------|--------|-------|--------|--------|

|        |        |        |        |        |         |
|--------|--------|--------|--------|--------|---------|
| Ser363 | -0.291 | -4.677 | -0.172 | -0.680 | -5.820  |
| Gly364 | -1.994 | 1.842  | -1.274 | -1.225 | -2.651  |
| Arg380 | -2.521 | -2.383 | -0.104 | -1.457 | -6.464  |
| Asn414 | -1.121 | -2.758 | -0.823 | -0.665 | -5.367  |
| Arg415 | -4.935 | -1.970 | -1.721 | -3.337 | -11.962 |
| Gln530 | -0.742 | -5.546 | 0.197  | -0.728 | -6.819  |
| Ser555 | -0.753 | -5.870 | 1.240  | -0.662 | -6.045  |
| Ala556 | -2.300 | -0.564 | 0.175  | -1.703 | -4.392  |
| Ser602 | -0.811 | -0.612 | 0.793  | -0.481 | -1.110  |

---

**Compound N5 / Keap1 system**

---

|        |        |        |        |        |         |
|--------|--------|--------|--------|--------|---------|
| Tyr334 | -2.668 | -0.619 | 1.054  | -1.984 | -4.217  |
| Ser363 | -1.274 | -1.896 | -0.112 | -0.820 | -4.101  |
| Gly364 | -2.047 | -0.190 | -0.960 | -1.279 | -4.476  |
| Arg380 | -2.175 | -2.327 | -0.610 | -1.262 | -6.374  |
| Asn414 | -1.038 | -2.707 | -1.577 | -0.533 | -5.855  |
| Arg415 | -4.138 | -4.126 | -1.109 | -2.728 | -12.101 |
| Gln530 | -0.379 | -2.842 | 0.495  | -0.312 | -3.038  |
| Ser555 | -0.650 | -3.276 | 1.221  | -0.462 | -3.166  |
| Ala556 | -2.405 | -1.335 | 0.602  | -1.613 | -4.751  |
| Ser602 | -0.797 | -1.017 | 1.061  | -0.455 | -1.207  |

---

**Compound N8 / Keap1 system**

---

|        |        |       |       |        |        |
|--------|--------|-------|-------|--------|--------|
| Tyr334 | -1.543 | 0.027 | 0.416 | -0.851 | -1.951 |
|--------|--------|-------|-------|--------|--------|



|        |        |        |        |        |         |
|--------|--------|--------|--------|--------|---------|
| Ser363 | -1.264 | -1.073 | 0.235  | -0.727 | -2.828  |
| Gly364 | -2.503 | -0.306 | -1.446 | -1.452 | -5.707  |
| Arg380 | -2.791 | -4.505 | 1.441  | -1.622 | -7.477  |
| Asn414 | -0.805 | -3.195 | -1.423 | -0.630 | -6.052  |
| Arg415 | -4.455 | -4.210 | -1.899 | -2.951 | -13.515 |
| Gln530 | -0.430 | -0.709 | 0.050  | -0.289 | -1.378  |
| Ser555 | -0.976 | 0.197  | -0.390 | -0.577 | -1.746  |
| Ala556 | -2.173 | -0.994 | 0.271  | -1.654 | -4.551  |
| Ser602 | -0.861 | -3.277 | 1.230  | -0.689 | -3.598  |

---
